# Supplementary material
Source: publisher figshare collection journal article supplement (https://tandf.figshare.com/articles/dataset/_/6652328)
Supplement: Supplementary file 1 [file 1]

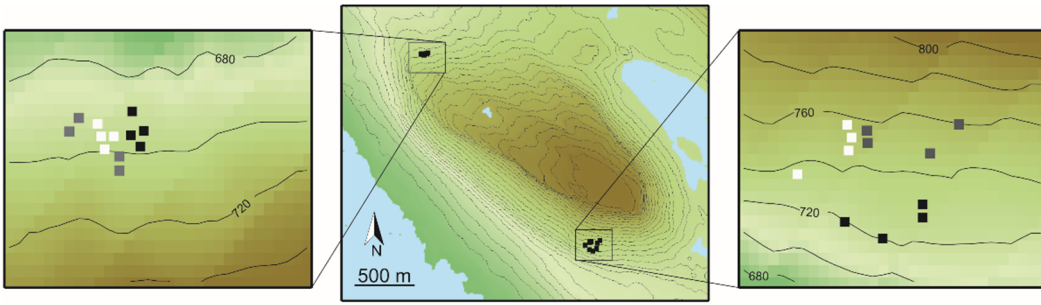

Figure S1. Location of the plots where phenological monitoring was carried out on Saana fell (central image) in 2014 and 2015 ( $69^{\circ}02'37''\text{N}$ ,  $20^{\circ}51'22''\text{E}$ ). The study plots were located on the north-eastern (left image) and south-western (right image) slope of the fell and represent areas with three different timings of snowmelt. Early plots (black squares) melted out between the beginning and the middle of May, Mid plots (grey) melted out between the end of May and the beginning of June and Late plots (white) melted out between the middle of June and the beginning of July. Note that plots are not to scale.
