# Supplementary material
Source: publisher figshare collection journal article supplement (https://tandf.figshare.com/articles/dataset/_/6652328)
Supplement: Supplementary file 2 [file 1]

(a)

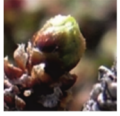

Bud green

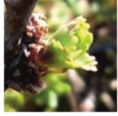

Leaf  
unfolded

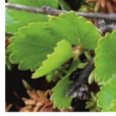

Leaf  
expanded

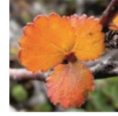

Leaf  
senescence

(b)

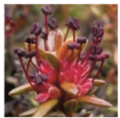

Flower  
open

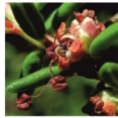

Flower  
senescence

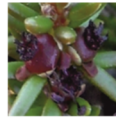

Fruit set  
visible

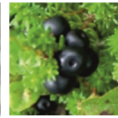

Fruit ripe

Figure S2. Representative photographs of (a) four vegetative phenophases in *Betula nana* (Bud green, leaf unfolded, leaf expanded, leaf senescence) and (b) four reproductive phenophases in *Empetrum nigrum* (Flower open, flower senescence, fruit set visible, fruit ripe). The photos exemplify the appearance of the eight monitored phenophases. Photo of flower senescence: © Alpandino (alpandino.org).
