# Supplementary material
Source: publisher figshare collection journal article supplement (https://tandf.figshare.com/articles/dataset/_/6652328)
Supplement: Supplementary file 3 [file 1]

Table S1 Results from the analysis of variance of linear mixed-effects models. We tested the effect of the factors Snowmelt (levels: Early, Mid, Late), Site (levels: North, South) and Year (levels: 2014, 2015) and their interactions on the timing of vegetative phenophases. The plot from which an observation was made was the random effect. The left-hand column lists the species and phenophases which were analysed and the factor levels which were included in each model. Each model was fitted twice with one of two response variables: either the number of days after snowmelt, or the day of year, when a phenophase occurred for the first time. Non-significant ( $p>0.05$ ) interactions or main effects were identified by the maximum likelihood ratio test and excluded from the model. For each main effect and each significant interaction, degrees of freedom (in subscript),  $F$ -values and  $p$ -values are shown.

| Phenophase and species                                                      | Days after snowmelt                 |                             |                                   |                                                                                                                                                                                                                                         | Day of year                        |                                     |                                     |                                                                                                                       |
|-----------------------------------------------------------------------------|-------------------------------------|-----------------------------|-----------------------------------|-----------------------------------------------------------------------------------------------------------------------------------------------------------------------------------------------------------------------------------------|------------------------------------|-------------------------------------|-------------------------------------|-----------------------------------------------------------------------------------------------------------------------|
|                                                                             | Snowmelt                            | Site                        | Year                              | Significant interactions                                                                                                                                                                                                                | Snowmelt                           | Site                                | Year                                | Significant interactions                                                                                              |
| Bud green<br><i>Empetrum nigrum</i><br>North-South, Early-Mid,<br>2014-2015 | $F_{1,10}=16.9615$ ,<br>$p=0.0021$  | $F_{1,10}=2.7248$ ,<br>n.s. | $F_{1,463}=837.76$ ,<br>$p<.0001$ | Snowmelt x Site ( $F_{1,10}=5.4217$ ,<br>$p=0.0422$ )<br>Snowmelt x Year<br>( $F_{1,463}=310.675$ , $p<.0001$ )<br>Site x Year ( $F_{1,463}=266.7251$ ,<br>$p<.0001$ )<br>Snowmelt x Site x Year<br>( $F_{1,463}=44.7612$ , $p<.0001$ ) | $F_{1,10}=68.26$ ,<br>$p<.0001$    | $F_{1,10}=17.84$ ,<br>$p=0.0018$    | $F_{1,463}=572.05$ ,<br>$p<.0001$   | Snowmelt x Year ( $F_{1,463}=243.4$ ,<br>$p<.0001$ )<br>Snowmelt x Site x Year<br>( $F_{1,463}=13.67$ , $p=0.0002$ )  |
| North, Early-Mid-Late, 2015                                                 | $F_{2,7}=15.0138$ ,<br>$p=0.0029$ ) | -                           | -                                 | -                                                                                                                                                                                                                                       | Could not be<br>tested             |                                     |                                     |                                                                                                                       |
| <i>Betula nana</i>                                                          | $F_{1,8}=2.95589$ ,<br>n.s.         | $F_{1,8}=0.0061$ ,<br>n.s.  | $F_{1,420}=1.7709$ ,<br>n.s.      | Snowmelt x Year<br>( $F_{1,420}=109.0079$ , $p<.0001$ )<br>Site x Year ( $F_{1,420}=131.3763$ ,<br>$p<.0001$ )<br>Snowmelt x Site x Year<br>( $F_{1,420}=27.4204$ , $p<.0001$ )                                                         | $F_{1,8}=17.419$ ,<br>$p=0.0031$ ) | $F_{1,8}=3.536$ ,<br>n.s.           | $F_{1,420}=9.348$ ,<br>$p=0.0024$ ) | Snowmelt x Year ( $F_{1,420}=17.483$ ,<br>$p<.0001$ )<br>Snowmelt x Site x Year<br>( $F_{1,420}=17.216$ , $p<.0001$ ) |
| <i>Salix herbacea</i><br>North-South, 2015                                  | n.s.                                | n.s.                        | n.s.                              | n.s.                                                                                                                                                                                                                                    | n.s.                               | n.s.                                | n.s.                                | n.s.                                                                                                                  |
| <i>Vaccinium myrtillus</i><br>North-South, Late, 2015                       | -                                   | n.s.                        | -                                 | -                                                                                                                                                                                                                                       | -                                  | $F_{1,420}=17.216$ ,<br>$p<.0001$ ) | -                                   | -                                                                                                                     |

| Phenophase and species            | Days after snowmelt            |                                |                                  |                                                                                                                                                                       | Day of year                   |                               |                                 |                                                                                                                                                                  |
|-----------------------------------|--------------------------------|--------------------------------|----------------------------------|-----------------------------------------------------------------------------------------------------------------------------------------------------------------------|-------------------------------|-------------------------------|---------------------------------|------------------------------------------------------------------------------------------------------------------------------------------------------------------|
|                                   | Snowmelt                       | Site                           | Year                             | Significant interactions                                                                                                                                              | Snowmelt                      | Site                          | Year                            | Significant interactions                                                                                                                                         |
| North, Late, 2014-2015            | -                              | -                              | Could not be tested              | -                                                                                                                                                                     | -                             | -                             | $F_{1,93}=503.21$ , $p<.0001$ ) | -                                                                                                                                                                |
| <i>Vaccinium uliginosum</i>       |                                |                                |                                  |                                                                                                                                                                       |                               |                               |                                 |                                                                                                                                                                  |
| South, Early-Mid-Late, 2015       | n.s.                           | -                              | -                                | -                                                                                                                                                                     | Could not be tested           |                               |                                 |                                                                                                                                                                  |
| South, Mid, 2014-2015             | Could not be tested            |                                |                                  |                                                                                                                                                                       | Could not be tested           |                               |                                 |                                                                                                                                                                  |
| North-South, Early, 2015          | -                              | n.s.                           | n.s.                             | n.s.                                                                                                                                                                  | -                             | n.s.                          | -                               | -                                                                                                                                                                |
| North, Early, 2014-2015           | Could not be tested            |                                |                                  |                                                                                                                                                                       | -                             | -                             | n.s.                            | -                                                                                                                                                                |
| <i>Vaccinium vitis-idaea</i>      |                                |                                |                                  |                                                                                                                                                                       |                               |                               |                                 |                                                                                                                                                                  |
| North-South, Early-Mid, 2014-2015 | $F_{1,11}=3.07923$ , n.s.      | $F_{1,11}=0.487$ , n.s.        | $F_{1,213}=0.1498$ , n.s.        | Snowmelt x Year ( $F_{1,213}=10.617$ , $p=0.0013$ )<br>Site x Year ( $F_{1,213}=14.8881$ , $p=0.0002$ )<br>Snowmelt x Site x Year ( $F_{1,213}=8.0036$ , $p=0.0051$ ) | $F_{1,13}=1.773$ , n.s.       | n.s.                          | $F_{1,215}=3.617$ , n.s.        | Snowmelt x Year ( $F_{1,215}=5.445$ , $p=0.0205$ )                                                                                                               |
| North-South, Early-Mid-Late, 2015 | $F_{1,13}=5.2867$ , $p=0.0209$ | $F_{1,13}=5.8442$ , $p=0.0311$ | -                                | n.s.                                                                                                                                                                  | $F_{2,14}=4.463$ , $p=0.0317$ | n.s.                          | -                               | n.s.                                                                                                                                                             |
| Leaf unfolded                     |                                |                                |                                  |                                                                                                                                                                       |                               |                               |                                 |                                                                                                                                                                  |
| <i>Empetrum nigrum</i>            |                                |                                |                                  |                                                                                                                                                                       |                               |                               |                                 |                                                                                                                                                                  |
| North-South, Early-Mid, 2014-2015 | $F_{1,10}=12.119$ , $p=0.0059$ | $F_{1,10}=0.8464$ , n.s.       | $F_{1,444}=563.9982$ , $p<.0001$ | Snowmelt x Year ( $F_{1,444}=32.1665$ , $p<.0001$ )<br>Site x Year ( $F_{1,444}=327.2809$ , $p<.0001$ )<br>Snowmelt x Site x Year ( $F_{1,444}=38.5027$ , $p<.0001$ ) | $F_{1,10}=23.47$ , $p=0.0007$ | $F_{1,10}=21.44$ , $p=0.0009$ | $F_{1,442}=302.19$ , $p<.0001$  | Snowmelt x Year ( $F_{1,442}=10.48$ , $p=0.0013$ )<br>Site x Year ( $F_{1,442}=26.88$ , $p<.0001$ )<br>Snowmelt x Site x Year ( $F_{1,442}=10.35$ , $p=0.0014$ ) |
| North, Early-Mid-Late, 2015       | $F_{2,7}=35.8791$ , $p=0.0002$ | -                              | $F_{1,296}=206.8937$ , $p<.0001$ | Snowmelt: Year ( $F_{2,296}=31.6464$ , $p<.0001$ )                                                                                                                    | $F_{2,7}=13.342$ , $p=0.0041$ | -                             | $F_{1,296}=222.621$ , $p<.0001$ | n.s.                                                                                                                                                             |
| <i>Betula nana</i>                | $F_{1,8}=2.0939$ , n.s.        | $F_{1,8}=0.2328$ , n.s.        | $F_{1,423}=342.4571$ , $p<.0001$ | Snowmelt x Year ( $F_{1,423}=6.2124$ , $p=0.0131$ )<br>Site x Year ( $F_{1,423}=227.6261$ , $p<.0001$ )                                                               | $F_{1,8}=31.724$ , $p=0.0005$ | $F_{1,8}=5.624$ , $p=0.0451$  | $F_{1,423}=212.167$ , $p<.0001$ | Snowmelt x Year ( $F_{1,423}=108.863$ , $p<.0001$ )<br>Site x Year ( $F_{1,423}=22.036$ , $p<.0001$ )                                                            |

| Phenophase and species                                                          | Days after snowmelt               |                                    |                                       |                                                                                                                                                                                | Day of year                      |                           |                                    |                                                             |
|---------------------------------------------------------------------------------|-----------------------------------|------------------------------------|---------------------------------------|--------------------------------------------------------------------------------------------------------------------------------------------------------------------------------|----------------------------------|---------------------------|------------------------------------|-------------------------------------------------------------|
|                                                                                 | Snowmelt                          | Site                               | Year                                  | Significant interactions                                                                                                                                                       | Snowmelt                         | Site                      | Year                               | Significant interactions                                    |
|                                                                                 |                                   |                                    |                                       | Snowmelt x Site x Year<br>( $F_{1,423}=80.2069$ , $p<.0001$ )                                                                                                                  |                                  |                           |                                    | Snowmelt x Site x Year<br>( $F_{1,423}=59.76$ , $p<.0001$ ) |
| <i>Phyllodoce caerulea</i><br>North-South, Late, 2014-2015                      | -                                 | $F_{1,6}=5.49$ , n.s.              | $F_{1,221}=15.8523$ ,<br>$p=0.0001$ ) |                                                                                                                                                                                | -                                | $F_{1,6}=0$ , n.s.        | $F_{1,220}=15.14$ ,<br>$p=0.0001$  | Site x Year ( $F_{1,220}=28.92$ ,<br>$p<.0001$ )            |
| South, Mid-Late, 2014-2015                                                      | $F_{1,4}=42.6005$ ,<br>$p=0.0028$ | -                                  | $F_{1,137}=1.5399$ ,<br>n.s.          | Snowmelt:Year ( $F_{1,137}=5.7805$ ,<br>$p=0.0175$ )                                                                                                                           | $F_{1,4}=33.31$ ,<br>$p=0.0045$  | -                         | $F_{1,138}=65.89$ ,<br>$p<.0001$   | n.s.                                                        |
| <i>Salix herbacea</i>                                                           | n.s.                              | n.s.                               | n.s.                                  | n.s.                                                                                                                                                                           | -                                | $F_{1,3}=0.945$ ,<br>n.s. | $F_{1,145}=469.227$ ,<br>$p<.0001$ | Site x Year ( $F_{1,145}=168.354$ ,<br>$p<.0001$ )          |
| <i>Vaccinium myrtillus</i>                                                      | -                                 | $F_{1,6}=8.66$ ,<br>$p=0.0259$     | $F_{1,221}=104.89$ ,<br>$p<.0001$     | Site x Year ( $F_{1,221}=136.42$ ,<br>$p<.0001$ )                                                                                                                              | Could not be<br>tested           |                           |                                    |                                                             |
| <i>V. uliginosum</i><br>South, Early-Mid-Late, 2015                             | $F_{2,7}=10.9699$ ,<br>$p=0.007$  | -                                  | -                                     | -                                                                                                                                                                              | $F_{2,7}=13.185$ ,<br>$p=0.0042$ | -                         | -                                  | -                                                           |
| North-South, Early, 2014-<br>2015                                               | Could not be<br>tested            |                                    |                                       |                                                                                                                                                                                | -                                | $F_{1,5}=0.3$ , n.s.      | $F_{1,189}=638.6$ ,<br>$p<.0001$   | Site x Year ( $F_{1,189}=10.8$ ,<br>$p=0.0012$ )            |
| <i>Vaccinium vitis-idaea</i><br>North-South, Early-Mid,<br>2014-2015            | $F_{1,11}=154.095$ ,<br>$p<.0001$ | $F_{1,11}=16.227$ ,<br>$p=0.002$   | $F_{1,165}=31.402$ ,<br>$p<.0001$     | Snowmelt x Site ( $F_{1,11}=7.524$ ,<br>$p=0.0191$ )<br>Snowmelt x Year ( $F_{1,165}=6.709$ ,<br>$p=0.0105$ )<br>Snowmelt x Site x Year<br>( $F_{1,165}=17.206$ , $p=0.0001$ ) | $F_{1,11}=0.82$ ,<br>n.s.        | $F_{1,11}=0.15$ ,<br>n.s. | $F_{1,165}=13.52$ ,<br>$p=0.0003$  | Snowmelt x Site x Year<br>( $F_{1,165}=4.78$ , $p=0.0301$ ) |
| North-South, Early-Mid-Late,<br>2015                                            | $F_{2,11}=97.3154$ ,<br>$p<.0001$ | $F_{1,11}=25.5879$ ,<br>$p=0.0004$ | -                                     | Snowmelt x Site ( $F_{2,11}=13.9307$ ,<br>$p=0.001$ )                                                                                                                          | $F_{2,11}=10.41$ ,<br>$p=0.0029$ | $F_{1,11}=4.15$ ,<br>n.s. | -                                  | Snowmelt x Site ( $F_{2,11}=7.2$ ,<br>$p=0.01$ )            |
| Leaf expanded<br><i>Empetrum nigrum</i><br>North-South, Early-Mid,<br>2014-2015 | $F_{1,10}=35.292$ ,<br>$p=0.0001$ | $F_{1,10}=10.307$ ,<br>$p=0.0093$  | $F_{1,413}=2101.243$ ,<br>$p<.0001$   | Snowmelt x Year ( $F_{1,413}=21.693$ ,<br>$p<.0001$ )                                                                                                                          | $F_{1,10}=17.45$ ,<br>$p=0.0019$ | $F_{1,10}=0.01$ ,<br>n.s. | $F_{1,413}=1704.07$ ,<br>$p<.0001$ | Snowmelt x Year ( $F_{1,413}=6.05$ ,<br>$p=0.0143$ )        |

| Phenophase and species            | Days after snowmelt            |                                 |                                  |                                                                                                                                                                      | Day of year                   |                             |                                 |                                                          |
|-----------------------------------|--------------------------------|---------------------------------|----------------------------------|----------------------------------------------------------------------------------------------------------------------------------------------------------------------|-------------------------------|-----------------------------|---------------------------------|----------------------------------------------------------|
|                                   | Snowmelt                       | Site                            | Year                             | Significant interactions                                                                                                                                             | Snowmelt                      | Site                        | Year                            | Significant interactions                                 |
|                                   |                                |                                 |                                  | Site x Year ( $F_{1,413}=166.727$ , $p<.0001$ )<br>Snowmelt x Site x Year ( $F_{1,413}=20.388$ , $p<.0001$ )<br>Snowmelt x Year ( $F_{2,294}=14.836$ , $p<.0001$ )   |                               |                             |                                 | Snowmelt x Site x Year ( $F_{1,413}=9.52$ , $p=0.0022$ ) |
| North, Early-Mid-Late, 2015       | $F_{2,7}=100.391$ , $p<.0001$  | -                               | $F_{1,294}=1168.623$ , $p<.0001$ |                                                                                                                                                                      | $F_{2,7}=19.62$ , $p=0.0013$  | -                           | $F_{1,294}=1261.72$ , $p<.0001$ | Snowmelt x Year ( $F_{2,294}=22.22$ , $p<.0001$ )        |
| <i>Betula nana</i>                | $F_{1,8}=7.9118$ , $p=0.0227$  | $F_{1,8}=1.6067$ , n.s.         | $F_{1,416}=0.7045$ , n.s.        | Snowmelt x Year ( $F_{1,416}=24.5042$ , $p<.0001$ )<br>Site x Year ( $F_{1,416}=31.6996$ , $p<.0001$ )<br>Snowmelt x Site x Year ( $F_{1,416}=13.566$ , $p=0.0003$ ) | $F_{1,8}=12.11$ , $p=0.0083$  | $F_{1,8}=5.55$ , $p=0.0462$ | $F_{1,416}=21.75$ , $p<.0001$   | Snowmelt x Site x Year ( $F_{1,416}=18.18$ , $p<.0001$ ) |
| <i>Phyllodoce caerulea</i>        |                                |                                 |                                  |                                                                                                                                                                      |                               |                             |                                 |                                                          |
| North-South, Late, 2014-2015      | -                              | $F_{1,6}=1.2439$ , n.s.         | $F_{1,168}=91.5511$ , $p<.0001$  | Site x Year ( $F_{1,168}=6.0306$ , $p=0.0151$ )                                                                                                                      | -                             | $F_{1,6}=0.067$ , n.s.      | $F_{1,168}=14.497$ , $p=0.0002$ | Site x Year ( $F_{1,168}=35.041$ , $p<.0001$ )           |
| South, Mid-Late, 2014-2015        | $F_{1,4}=19.8873$ , $p=0.0112$ | -                               | $F_{1,99}=36.37692$ , $p<.0001$  | Snowmelt x Year ( $F_{1,99}=3.93967$ , $p=0.0499$ )                                                                                                                  | $F_{1,4}=0.442$ , n.s.        | -                           | $F_{1,99}=1.022$ , n.s.         | Snowmelt x Year ( $F_{1,99}=9.704$ , $p=0.0024$ )        |
| <i>Salix herbacea</i>             | -                              | $F_{1,3}=5.46$ , n.s.           | $F_{1,196}=0.28$ , n.s.          | Site x Year ( $F_{1,196}=74.91$ , $p<.0001$ )                                                                                                                        | Could not be tested           |                             |                                 |                                                          |
| <i>Vaccinium myrtillus</i>        | Could not be tested            |                                 |                                  |                                                                                                                                                                      | Could not be tested           |                             |                                 |                                                          |
| <i>Vaccinium uliginosum</i>       |                                |                                 |                                  |                                                                                                                                                                      |                               |                             |                                 |                                                          |
| South, Early-Mid-Late, 2015       | $F_{2,7}=11.5842$ , $p=0.006$  | -                               | n.s.                             | n.s.                                                                                                                                                                 | $F_{2,7}=12.999$ , $p=0.0044$ | -                           | n.s.                            | n.s.                                                     |
| North-South, Early, 2014-2015     | Could not be tested            |                                 |                                  |                                                                                                                                                                      | -                             | $F_{1,5}=3.855$ , n.s.      | $F_{1,199}=13.982$ , $p=0.0002$ | Site x Year ( $F_{1,199}=80.916$ , $p<.0001$ )           |
| <i>Vaccinium vitis-idaea</i>      |                                |                                 |                                  |                                                                                                                                                                      |                               |                             |                                 |                                                          |
| North-South, Early-Mid, 2014-2015 | $F_{1,11}=70.1505$ , $p<.0001$ | $F_{1,11}=26.8237$ , $p=0.0003$ | $F_{1,156}=90.9211$ , $p<.0001$  | Site x Year ( $F_{1,156}=10.5456$ , $p=0.0014$ )                                                                                                                     | n.s.                          | $F_{1,13}=5.2$ , $p=0.0401$ | $F_{1,59}=67.65$ , $p<.0001$    | n.s.                                                     |

| Phenophase and species                                               | Days after snowmelt               |                                    |                                    |                                                               | Day of year         |                           |                                   |                                                   |
|----------------------------------------------------------------------|-----------------------------------|------------------------------------|------------------------------------|---------------------------------------------------------------|---------------------|---------------------------|-----------------------------------|---------------------------------------------------|
|                                                                      | Snowmelt                          | Site                               | Year                               | Significant interactions                                      | Snowmelt            | Site                      | Year                              | Significant interactions                          |
|                                                                      |                                   |                                    |                                    | Snowmelt x Site x Year<br>( $F_{1,156}=4.0498$ , $p=0.0459$ ) |                     |                           |                                   |                                                   |
| North-South, Early-Mid-Late, 2015                                    | $F_{2,13}=35.7584$ ,<br>$p<.0001$ | $F_{1,13}=21.3631$ ,<br>$p=0.0005$ | -                                  | n.s.                                                          | n.s.                | n.s.                      | -                                 | n.s.                                              |
| Leaf senescence<br><i>Betula nana</i><br>North, Early-Mid, 2014-2015 | $F_{1,6}=84.73$ ,<br>$p=0.0001$   | -                                  | $F_{1,270}=182.545$ ,<br>$p<.0001$ | n.s.                                                          | Could not be tested |                           |                                   |                                                   |
| North-South, Mid, 2014-2015                                          | -                                 | $F_{1,4}=4.0287$ ,<br>n.s.         | $F_{1,186}=18.448$ ,<br>$p<.0001$  | Site x Year ( $F_{1,186}=91.5907$ ,<br>$p<.0001$ )            | Could not be tested |                           |                                   |                                                   |
| <i>Salix herbacea</i><br>North-South, Late, 2014                     | Could not be tested               |                                    |                                    |                                                               | -                   | n.s.                      | n.s.                              | n.s.                                              |
| <i>Vaccinium myrtillus</i>                                           | -                                 | n.s.                               | $F_{1,183}=38.1119$ ,<br>$p<.0001$ | n.s.                                                          | -                   | $F_{1,6}=0.446$ ,<br>n.s. | $F_{1,182}=7.229$ ,<br>$p=0.0078$ | Site x Year ( $F_{1,182}=19.459$ ,<br>$p<.0001$ ) |
| <i>Vaccinium uliginosum</i><br>South, Early-Mid-Late, 2014-2015      | $F_{2,6}=26.6222$ ,<br>$p=0.001$  | -                                  | $F_{1,182}=96.2433$ ,<br>$p<.0001$ | Snowmelt x Year ( $F_{2,182}=5.827$ ,<br>$p=0.0035$ )         | n.s.                | -                         | *                                 | n.s.                                              |

"-" – This term was not part of the analysis

"Could not be tested" – The data did not fulfil the ANOVA assumptions
