# Supplementary material
Source: publisher figshare collection journal article supplement (https://tandf.figshare.com/articles/dataset/_/6652328)
Supplement: Supplementary file 4 [file 1]

Table S2. Results from the analysis of variance of linear mixed-effects models. We tested the effect of the factors Snowmelt (levels: Early, Mid, Late), Site (levels: North, South) and Year (levels: 2014, 2015) and their interactions on the timing of reproductive phenophases. The plot from which an observation was made was the random effect. The left-hand column lists the species and phenophases which were analysed and the factor levels which were included in each model. Each model was fitted twice with one of two response variables: either the number of days after snowmelt, or the day of year, when a phenophase occurred for the first time. Non-significant ( $p>0.05$ ) interactions or main effects were identified by the maximum likelihood ratio test and excluded from the model. For each main effect and each significant interaction, degrees of freedom (in subscript),  $F$ -values and  $p$ -values are shown.

| Phenophase and species                                                  | Days after snowmelt               |                                   |                                     |                                                         | Day of year                     |                                 |                                    |                                                        |
|-------------------------------------------------------------------------|-----------------------------------|-----------------------------------|-------------------------------------|---------------------------------------------------------|---------------------------------|---------------------------------|------------------------------------|--------------------------------------------------------|
|                                                                         | Snowmelt                          | Site                              | Year                                | Significant interactions                                | Snowmelt                        | Site                            | Year                               | Significant interactions                               |
| Flower opening<br><i>Empetrum nigrum</i><br>North, Early-Mid, 2014-2015 | $F_{1,6}=38.0668$ ,<br>$p=0.0008$ | -                                 | $F_{1,103}=9.0706$ ,<br>$p=0.0033$  | Snowmelt x Year<br>( $F_{1,103}=408.6525$ , $p<.0001$ ) | $F_{1,6}=16.8$ ,<br>$p=0.0064$  | -                               | $F_{1,103}=58.314$ ,<br>$p<.0001$  | Snowmelt x Year<br>( $F_{1,103}=231.645$ , $p<.0001$ ) |
| North-South, Early, 2015                                                | -                                 | $F_{1,5}=3.5734$ ,<br>n.s.        | -                                   | -                                                       | -                               | $F_{1,5}=29.79$ ,<br>$p=0.0028$ | -                                  | -                                                      |
| <i>Phyllodoce caerulea</i><br>North-South, Late, 2014-2015              | -                                 | n.s.                              | $F_{1,183}=1251.818$ ,<br>$p<.0001$ | n.s.                                                    | -                               | $F_{1,6}=77.9$ ,<br>$p=0.0001$  | $F_{1,182}=441.8$ ,<br>$p<.0001$   | Site x Year ( $F_{1,182}=145.6$ ,<br>$p<.0001$ )       |
| South, Mid-Late, 2014-2015                                              | $F_{1,4}=67.7635$ ,<br>$p=0.0012$ | -                                 | $F_{1,136}=596.6245$ ,<br>$p<.0001$ | Snowmelt x Year ( $F_{1,136}=4.4209$ ,<br>$p=0.0373$ )  | $F_{1,4}=76.92$ ,<br>$p=0.0009$ | -                               | $F_{1,136}=18.74$ ,<br>$p<.0001$   | Snowmelt x Year ( $F_{1,136}=9.83$ ,<br>$p=0.0021$ )   |
| <i>Vaccinium myrtillus</i>                                              | Could not be<br>tested            |                                   |                                     |                                                         | Could not be<br>tested          |                                 |                                    |                                                        |
| <i>Vaccinium uliginosum</i><br>North-South, Early, 2014-<br>2015        | -                                 | $F_{1,5}=12.8045$ ,<br>$p=0.0159$ | $F_{1,104}=140.5085$ ,<br>$p<.0001$ | Site x Year ( $F_{1,104}=80.4184$ ,<br>$p<.0001$ )      | -                               | $F_{1,5}=0.33$ , n.s.           | $F_{1,104}=211.505$ ,<br>$p<.0001$ | Site x Year ( $F_{1,104}=8.134$ ,<br>$p=0.0052$ )      |
| South, Early-Mid, 2014-2015                                             | $F_{1,5}=27.6181$ ,<br>$p=0.0033$ | -                                 | $F_{1,103}=387.4231$ ,<br>$p<.0001$ | Snowmelt x Year ( $F_{1,103}=21.556$ ,<br>$p<.0001$ )   | $F_{1,5}=5.204$ ,<br>n.s.       | -                               | $F_{1,103}=166.945$ ,<br>$p<.0001$ | Snowmelt x Year ( $F_{1,103}=25.483$ ,<br>$p<.0001$ )  |

| Phenophase and species                                                     | Days after snowmelt                |                                    |                                     |                                                                                                                                                                            | Day of year                       |                                 |                                   |                                                       |
|----------------------------------------------------------------------------|------------------------------------|------------------------------------|-------------------------------------|----------------------------------------------------------------------------------------------------------------------------------------------------------------------------|-----------------------------------|---------------------------------|-----------------------------------|-------------------------------------------------------|
|                                                                            | Snowmelt                           | Site                               | Year                                | Significant interactions                                                                                                                                                   | Snowmelt                          | Site                            | Year                              | Significant interactions                              |
| South, Early-Mid-Late, 2015                                                | $F_{2,6}=13.4142$ ,<br>$p=0.0061$  | -                                  | -                                   | -                                                                                                                                                                          | $F_{2,6}=17.61$ ,<br>$p=0.0031$   | -                               | -                                 | -                                                     |
| <i>Vaccinium vitis-idaea</i><br>North-South, Early-Mid,<br>2014-2015       | $F_{1,10}=194.217$ ,<br>$p<.0001$  | $F_{1,10}=37.311$ ,<br>$p=0.0001$  | $F_{1,122}=1122.112$ ,<br>$p<.0001$ | Snowmelt x Site ( $F_{1,10}=46.273$ ,<br>$p<.0001$ )<br>Site x Year ( $F_{1,122}=16.754$ ,<br>$p=0.0001$ )<br>Snowmelt x Site x Year<br>( $F_{1,122}=9.407$ , $p=0.0027$ ) | $F_{1,10}=85.3$ ,<br>$p<.0001$    | $F_{1,10}=41.3$ ,<br>$p=0.0001$ | $F_{1,125}=776.4$ ,<br>$p<.0001$  | Snowmelt x Site ( $F_{1,10}=65.6$ ,<br>$p<.0001$ )    |
| North-South, Early-Mid-Late,<br>2015                                       | $F_{2,13}=22.1912$ ,<br>$p=0.0001$ | $F_{1,13}=17.4129$ ,<br>$p=0.0011$ | -                                   | n.s.                                                                                                                                                                       | $F_{2,14}=11.409$ ,<br>$p=0.0011$ | n.s                             | -                                 | n.s                                                   |
| Flower senescence<br><i>Empetrum nigrum</i><br>North, Early-Mid, 2014-2015 | $F_{1,6}=6.89187$ ,<br>$p=0.0393$  | -                                  | $F_{1,249}=0.3435$ ,<br>n.s.        | Snowmelt x Year<br>( $F_{1,249}=156.0788$ , $p<.0001$ )                                                                                                                    | $F_{1,6}=18.991$ ,<br>$p=0.0048$  | -                               | $F_{1,249}=52.111$ ,<br>$p<.0001$ | Snowmelt x Year ( $F_{1,249}=97.623$ ,<br>$p<.0001$ ) |
| North-South, Early, 2014-<br>2015                                          | -                                  | $F_{1,6}=1.943$ ,<br>n.s.          | $F_{1,194}=0.3946$ ,<br>n.s.        | Site x Year ( $F_{1,194}=175.0225$ ,<br>$p<.0001$ )                                                                                                                        | -                                 | $F_{1,6}=38.86$ ,<br>$p=0.0008$ | $F_{1,194}=72.73$ ,<br>$p<.0001$  | Site x Year ( $F_{1,194}=81.12$ ,<br>$p<.0001$ )      |
| North-South, Early-Mid, 2015                                               | $F_{1,10}=3.4952$ ,<br>n.s.        | $F_{1,103}=166.945$ ,<br>n.s.      | -                                   | Snowmelt x Site ( $F_{1,10}=13.6157$ ,<br>$p=0.0042$ )                                                                                                                     | $F_{1,10}=90.96$ ,<br>$p<.0001$   | $F_{1,10}=59.74$ ,<br>$p<.0001$ | -                                 | Snowmelt x Site ( $F_{1,10}=10.05$ ,<br>$p=0.01$ )    |
| <i>Phyllodoce caerulea</i><br>North-South, Late, 2014-2015                 | -                                  | $F_{1,6}=6.8521$ ,<br>$p=0.0397$   | $F_{1,199}=1233.784$ ,<br>$p<.0001$ | n.s.                                                                                                                                                                       | -                                 | $F_{1,6}=0$ , n.s.              | $F_{1,198}=416.47$ ,<br>$p<.0001$ | Site x Year ( $F_{1,198}=178.32$ ,<br>$p<.0001$ )     |
| South, Mid-Late, 2014-2015                                                 | $F_{1,4}=92.2543$ ,<br>$p=0.0007$  | -                                  | $F_{1,141}=600.4432$ ,<br>$p<.0001$ | Snowmelt x Year ( $F_{1,141}=4.7627$ ,<br>$p=0.0307$ )                                                                                                                     | $F_{1,4}=9.73$ ,<br>$p=0.0356$    | -                               | $F_{1,141}=63.907$ ,<br>$p<.0001$ | Snowmelt x Year ( $F_{1,141}=8.484$ ,<br>$p=0.0042$ ) |
| <i>Vaccinium myrtillus</i>                                                 | Could not be<br>tested             |                                    |                                     |                                                                                                                                                                            | Could not be<br>tested            |                                 |                                   |                                                       |

| Phenophase and species            | Days after snowmelt                |                                 |                                    |                                                                                                                                                                             | Day of year                     |                                 |                                   |                                                     |
|-----------------------------------|------------------------------------|---------------------------------|------------------------------------|-----------------------------------------------------------------------------------------------------------------------------------------------------------------------------|---------------------------------|---------------------------------|-----------------------------------|-----------------------------------------------------|
|                                   | Snowmelt                           | Site                            | Year                               | Significant interactions                                                                                                                                                    | Snowmelt                        | Site                            | Year                              | Significant interactions                            |
| <i>Vaccinium uliginosum</i>       |                                    |                                 |                                    |                                                                                                                                                                             |                                 |                                 |                                   |                                                     |
| South, Early-Mid-Late, 2014-2015  | $F_{1,6}=23.3715$ ,<br>$p=0.0015$  | -                               | $F_{1,80}=323.4421$ ,<br>$p<.0001$ | Snowmelt x Year ( $F_{1,73}=10.418$ ,<br>$p=0.0001$ )                                                                                                                       | $F_{2,6}=16.61$ ,<br>$p=0.0036$ | -                               | $F_{1,80}=127.17$ ,<br>$p<.0001$  | Snowmelt x Year ( $F_{2,80}=6.34$ ,<br>$p=0.0028$ ) |
| North-South, Early, 2014-2015     | -                                  | $F_{1,5}=3.1984$ ,<br>n.s.      | $F_{1,85}=137.9683$ ,<br>$p<.0001$ | Site x Year ( $F_{1,85}=53.4447$ ,<br>$p<.0001$ )                                                                                                                           | -                               | n.s.                            | $F_{1,86}=200.736$ ,<br>$p<.0001$ | n.s.                                                |
| <i>Vaccinium vitis-idaea</i>      |                                    |                                 |                                    |                                                                                                                                                                             |                                 |                                 |                                   |                                                     |
| North-South, Early-Mid, 2014-2015 | $F_{1,9}=27.954$ ,<br>$p=0.0005$   | $F_{1,9}=0.2471$ ,<br>n.s.      | $F_{1,80}=160.0848$ ,<br>$p<.0001$ | Snowmelt x Year ( $F_{1,80}=4.5655$ ,<br>$p=0.0357$ )<br>Site x Year ( $F_{1,80}=10.6739$ ,<br>$p=0.0016$ )<br>Snowmelt x Site x Year<br>( $F_{1,80}=7.3165$ , $p=0.0083$ ) | n.s.                            | n.s.                            | $F_{1,83}=134.761$ ,<br>$p<.0001$ | n.s.                                                |
| North-South, Early-Mid-Late, 2015 | $F_{2,9}=5.9101$ ,<br>$p=0.023$    | $F_{1,9}=5.2323$ ,<br>$p=0.048$ | n.s.                               | n.s.                                                                                                                                                                        | n.s.                            | n.s.                            | -                                 | n.s.                                                |
| Fruitset visible                  |                                    |                                 |                                    |                                                                                                                                                                             |                                 |                                 |                                   |                                                     |
| <i>Empetrum nigrum</i>            |                                    |                                 |                                    |                                                                                                                                                                             |                                 |                                 |                                   |                                                     |
| North, Early-Mid, 2014-2015       | $F_{1,6}=38.153$ ,<br>$p=0.0008$   | -                               | $F_{1,136}=8.665$ ,<br>$p=0.0038$  | n.s.                                                                                                                                                                        | $F_{1,6}=26.979$ ,<br>$p=0.002$ | -                               | $F_{1,143}=7.71$ ,<br>$p=0.0062$  | n.s.                                                |
| North-South, Early, 2014-2015     | -                                  | $F_{1,6}=1.0266$ ,<br>n.s.      | $F_{1,132}=47.6274$ ,<br>$p<.0001$ | Site x Year ( $F_{1,132}=74.0540$ ,<br>$p<.0001$ )                                                                                                                          | -                               | $F_{1,6}=36.93$ ,<br>$p=0.0009$ | n.s.                              | n.s.                                                |
| North-South, Early-Mid, 2015      | $F_{1,180}=4.0784$ ,<br>n.s.       | $F_{1,9}=0.6976$ ,<br>n.s.      | -                                  | Snowmelt x Site ( $F_{1,9}=7.3917$ ,<br>$p=0.0237$ )                                                                                                                        | $F_{1,9}=62.04$ ,<br>$p<.0001$  | $F_{1,9}=65.24$ ,<br>$p<.0001$  | n.s.                              | Snowmelt x Site ( $F_{1,9}=12.45$ ,<br>$p=0.0064$ ) |
| <i>Phyllodoce caerulea</i>        |                                    |                                 |                                    |                                                                                                                                                                             |                                 |                                 |                                   |                                                     |
| North-South, Late, 2014-2015      | -                                  | n.s.                            | $F_{1,168}=227.94$ ,<br>$p<.0001$  | n.s.                                                                                                                                                                        | -                               | $F_{1,6}=4.06$ , n.s.           | $F_{1,167}=2.82$ , n.s.           | Site x Year ( $F_{1,167}=60.8$ , $p<.0001$ )        |
| South, Mid-Late, 2014-2015        | $F_{1,4}=108.6893$ ,<br>$p=0.0005$ | -                               | $F_{1,97}=95.8318$ ,<br>$p<.0001$  | Snowmelt x Year ( $F_{1,97}=6.7793$ ,<br>$p=0.0107$ )                                                                                                                       | Could not be tested             |                                 |                                   |                                                     |
| <i>Vaccinium myrtillus</i>        |                                    |                                 |                                    |                                                                                                                                                                             |                                 |                                 |                                   |                                                     |
| North-South, Late, 2014           | -                                  | n.s.                            | -                                  | -                                                                                                                                                                           | -                               | n.s.                            | -                                 | -                                                   |

| Phenophase and species                                              | Days after snowmelt                |                                    |                                    |                                                        | Day of year                      |                                 |                                   |                                              |
|---------------------------------------------------------------------|------------------------------------|------------------------------------|------------------------------------|--------------------------------------------------------|----------------------------------|---------------------------------|-----------------------------------|----------------------------------------------|
|                                                                     | Snowmelt                           | Site                               | Year                               | Significant interactions                               | Snowmelt                         | Site                            | Year                              | Significant interactions                     |
| North, Late, 2014-2015                                              | -                                  | -                                  | $F_{1,62}=200.809$ ,<br>$p<.0001$  | -                                                      | -                                | -                               | $F_{1,59}=103.35$ ,<br>$p<.0001$  | -                                            |
| <i>Vaccinium uliginosum</i><br>South, Early-Mid-Late, 2015          | $F_{2,6}=13.3311$ ,<br>$p=0.0062$  | -                                  | -                                  | -                                                      | $F_{2,6}=10.05$ ,<br>$p=0.0121$  | -                               | -                                 | -                                            |
| North-South, Early, 2014-2015                                       | Could not be tested                |                                    |                                    |                                                        | -                                | $F_{1,5}=12.6$ ,<br>$p=0.0164$  | $F_{1,86}=182.254$ ,<br>$p<.0001$ | n.s.                                         |
| South, Early-Mid, 2014-2015                                         | Could not be tested                |                                    |                                    |                                                        | n.s.                             | -                               | $F_{1,89}=94.5$ ,<br>$p<.0001$    | n.s.                                         |
| <i>Vaccinium vitis-idaea</i><br>North, Mid, 2014-2015               | -                                  | -                                  | $F_{1,28}=153.426$ ,<br>$p<.0001$  |                                                        | -                                | -                               | $F_{1,28}=104.11$ ,<br>$p<.0001$  | -                                            |
| North-South, Early-Mid-Late, 2015                                   | $F_{2,11}=15.2962$ ,<br>$p=0.0007$ | $F_{1,11}=20.1995$ ,<br>$p=0.0009$ | -                                  | n.s.                                                   | $F_{2,9}=4.909$ ,<br>$p=0.0362$  | $F_{1,9}=0.198$ ,<br>n.s.       | -                                 | Snowmelt x Site ( $F_{2,9}=2.879$ ,<br>n.s.) |
| South, Early-Mid, 2014-2015                                         | $F_{1,4}=3.2173$ ,<br>n.s.         | -                                  | $F_{1,43}=447.7688$ ,<br>$p<.0001$ | Snowmelt x Year ( $F_{1,43}=8.8636$ ,<br>$p=0.0048$ )  | $F_{1,4}=22.976$ ,<br>$p=0.0087$ | -                               | $F_{1,44}=124.603$ ,<br>$p<.0001$ | n.s.                                         |
| Fruit ripe<br><i>Empetrum nigrum</i><br>North, Early-Mid, 2014-2015 | $F_{1,4}=24.2883$ ,<br>$p=0.0079$  | -                                  | $F_{1,33}=185.0477$ ,<br>$p<.0001$ | Snowmelt x Year<br>( $F_{1,33}=18.3001$ , $p=0.0002$ ) | n.s.                             | -                               | $F_{1,34}=332.32$ ,<br>$p<.0001$  | n.s.                                         |
| North-South, Early, 2014-2015                                       | -                                  | $F_{1,4}=1.544$ ,<br>n.s.          | $F_{1,74}=605.9165$ ,<br>$p<.0001$ | Site x Year ( $F_{1,74}=137.9141$ ,<br>$p<.0001$ )     | -                                | $F_{1,4}=16.42$ ,<br>$p=0.0154$ | $F_{1,75}=702.07$ ,<br>$p<.0001$  | n.s.                                         |
| North-South, Early-Mid, 2015                                        | $F_{1,7}=14.063$ ,<br>$p=0.0072$   | $F_{1,7}=9.9051$ ,<br>$p=0.0162$   | -                                  | n.s.                                                   | n.s.                             | $F_{1,8}=6.3$ ,<br>$p=0.0363$   | -                                 | n.s.                                         |
| <i>Vaccinium myrtillus</i><br>North-South, Late, 2014               | -                                  | n.s.                               | -                                  | -                                                      | -                                | n.s.                            | -                                 | -                                            |

| Phenophase and species                                | Days after snowmelt |      |      |                          | Day of year         |      |      |                          |
|-------------------------------------------------------|---------------------|------|------|--------------------------|---------------------|------|------|--------------------------|
|                                                       | Snowmelt            | Site | Year | Significant interactions | Snowmelt            | Site | Year | Significant interactions |
| <i>Vaccinium uliginosum</i><br>South, Early-Mid, 2014 | Could not be tested |      |      |                          | Could not be tested |      |      |                          |

"-" – This term was not part of the analysis

"Could not be tested" – The data did not fulfil the ANOVA assumptions
